# 1 Gaze Behaviour Reveals Flexible Encoding of Competing Reach Goals Under 2 Conditions of Target Uncertainty

3

4 Anouk J. de Brouwer <sup>1,4\*</sup>, Michael J. Carter <sup>1,5\*</sup>, Lauren C. Smail <sup>2</sup>, Daniel M. Wolpert <sup>6</sup>,  
5 Jason P. Gallivan <sup>1,2,3</sup>, J. Randall Flanagan <sup>1,2</sup>

6

7 <sup>1</sup>Centre for Neuroscience Studies, <sup>2</sup>Department of Psychology, and <sup>3</sup>Department of  
8 Biomedical and Molecular Sciences, Queen's University, Kingston, Ontario, Canada;

9 <sup>4</sup>Department of Ophthalmology & Visual Sciences, University of British Columbia,

10 Vancouver, British Columbia, Canada; <sup>5</sup>Department of Kinesiology, McMaster University,

11 Hamilton, Ontario, Canada; <sup>6</sup>Zuckerman Mind Brain Behavior Institute, Department of

12 Neuroscience, Columbia University, New York, United States

13

14 \*Equal contributions

## 15 **Keywords**

16 Motor planning, decision-making, movement preparation, reaching, eye-hand coordination

17

## 18 **Abstract**

19 In daily tasks, we are often confronted with competing potential targets and must select one  
20 to act on. It has been suggested that, prior to target selection, the human brain encodes the  
21 motor goals of multiple, potential targets. However, this view remains controversial and it has  
22 been argued that only a single motor goal is encoded, or that motor goals are only specified  
23 after target selection. To investigate this issue, we measured participants' gaze behaviour  
24 while viewing two potential reach targets, one of which was cued after a preview period. We  
25 applied visuomotor rotations to dissociate each visual target location from its corresponding  
26 motor goal location; i.e., the location participants needed to aim their hand toward to bring  
27 the rotated cursor to the target. During the preview period, participants most often fixated  
28 both motor goals but also frequently fixated one, or neither, motor goal location. Further gaze  
29 analysis revealed that on trials in which both motor goals were fixated, both locations were  
30 held in memory simultaneously. These findings show that, at the level of single trials, the  
31 brain most often encodes multiple motor goals prior to target selection, but may also encode  
32 either one or no motor goals. This result may help reconcile a key debate concerning the  
33 specification of motor goals in cases of target uncertainty.

34

## 35 Introduction

36 Preparing a reaching movement towards a visual target is thought to involve transforming the  
37 visual representation of the target into a motor representation, which constitutes the motor  
38 goal of the action (Crawford et al., 2004). In our everyday lives, we frequently encounter  
39 situations in which we must select between competing potential targets of action, as when  
40 choosing a particular coffee mug to reach for from a cupboard. A fundamental, and as yet  
41 unresolved, question is whether, prior to target selection, the brain specifies and maintains, in  
42 parallel, competing motor goals for different potential targets (Gallivan et al., 2018).  
43 According to the influential affordance competition hypothesis (Cisek, 2012, 2007; Cisek and  
44 Kalaska, 2010; Thura and Cisek, 2014), the brain specifies motor goals for competing  
45 options, in parallel, before deciding which one to execute (see also Klaes et al., 2011; Suriya-  
46 Arunroj and Gail, 2019). Although a number of behavioural and neurophysiological studies  
47 have expressed support for this hypothesis, alternative interpretations of the results of this  
48 work have been put forward; arguing that only a single motor goal is specified prior to target  
49 selection (Dekleva et al., 2018) or that the motor goal is specified only after target selection  
50 (Gallivan et al., 2018).

51  
52 Support for the affordance competition hypothesis comes from single cell recording studies  
53 that have employed delayed reach tasks in which one of two potential targets is cued after a  
54 preview period. These studies have found that, prior to target selection, competing potential  
55 reach targets appear to be represented in parallel in brain areas thought to be directly involved  
56 in movement execution, including dorsal premotor cortex (Cisek and Kalaska, 2005; Coallier  
57 et al., 2015; Pastor-Bernier and Cisek, 2011) and the parietal reach region (Klaes et al.,  
58 2011). However, this parallel specification interpretation has recently been challenged by a  
59 study that simultaneously recorded activity from populations of neurons in dorsal premotor  
60 cortex during a delayed reach task with two potential targets (Dekleva et al., 2018). The  
61 authors of this study argued that the apparent parallel representation of competing targets is  
62 an artifact of averaging across trials, and that, at the level of single trials, neural population  
63 activity is more consistent with only a single potential target being represented. That is, they  
64 argued in favour of the hypothesis that the brain only encodes a single motor goal, and then  
65 revises this motor goal in favour of the other target if necessary; what they referred to as a  
66 stay-or-switch model.

67  
68 Behavioural studies have sought to test the parallel specification hypothesis using 'go-before-  
69 you-know' tasks. In such tasks, participants are simultaneously presented with two or more  
70 potential reach targets and are required to immediately launch a reach movement towards  
71 these competing targets *before* knowing the final target location, which is cued after  
72 movement onset (Chapman et al., 2010; Gallivan et al., 2017, 2016b, 2011; Haith et al., 2016;  
73 Stewart et al., 2014, 2013; Wong and Haith, 2017). In these tasks, the initial reach is typically  
74 directed towards the midpoint of the potential targets, leading to the initial suggestion that the  
75 motor system rapidly forms a motor plan for each potential target and then executes an  
76 average of these plans (Chapman et al., 2010). However, it has been shown that launching  
77 movements in an intermediate spatial direction minimizes motor costs associated with

78 corrective movements (Christopoulos et al., 2015; Christopoulos and Schrater, 2015; Hudson  
79 et al., 2007), and it has been argued that ‘averaging’ behaviour arises from executing a single  
80 movement that is optimized based on task constraints (Gallivan et al., 2018, 2017; Haith et  
81 al., 2015; Nashed et al., 2017; Wong and Haith, 2017). Using a delayed reach task, we  
82 provided behavioural evidence that motor goals of two potential targets are encoded during  
83 the preview period (Gallivan et al., 2015). However, it is possible that a stay-or-switch model  
84 could also account for the results of that study.

85

86 We recently examined gaze behaviour in a delayed reaching task with a single target under a  
87 visuomotor rotation (de Brouwer et al., 2018). We found that during the preview period,  
88 participants—in addition to fixating the visual target—reliably fixated the motor goal; i.e., an  
89 ‘aimpoint’, rotated away from the target, to which they subsequently directed their reaching  
90 movement (Rand and Rentsch, 2015; see also Rentsch and Rand, 2014). Here we employed a  
91 variant of this task with two potential targets to assess, using gaze behaviour, whether people  
92 specify a single motor goal or multiple motor goals in single reach trials.

93

94 We show that participants frequently fixated, and retained in memory, the motor goal  
95 locations of both potential targets, providing support for the parallel specification hypothesis.  
96 However, we also find that participants often fixated only one of the two motor goals, as  
97 predicted by the stay-or-switch model, or neither motor goal, suggesting that motor goal  
98 specification occurred after target selection. Individual participants exhibited multiple  
99 fixation strategies suggesting that individuals can flexibly alternate between different modes  
100 of motor goal encoding. These results may serve to reconcile seemingly disparate findings  
101 from previous studies that have assumed that only one encoding strategy is in operation,  
102 rather than a mixture of strategies.

## 103 **Results**

104 To assess the encoding of motor goals prior to target selection, we had participants perform a  
105 center-out reaching task in which they moved a cursor to visual targets presented on a vertical  
106 monitor. This was accomplished by sliding a hand-held stylus across a drawing tablet without  
107 vision of the hand, with forward and rightward stylus motion corresponding to upward and  
108 rightward cursor motion under baseline conditions. In each trial, one or two targets were  
109 presented on a visible ring composed of 60 small circles, with blue targets always appearing  
110 at one of four locations on the left half of the ring, and red targets always appearing at one of  
111 four locations on the right side of the ring (Fig. 1a). In 1-target reach trials, either a blue or a  
112 red target was displayed for a 2-s preview period, and in 2-target reach trials, one blue target  
113 and one red target were displayed for a 4-s preview phase. During the preview phase, all  
114 targets were presented as open circles. At the end of the preview phase, either the single  
115 target or one or the two targets was ‘filled in’, cueing the participant to reach to that target.  
116 Participants were instructed to make rapid movements such that the cursor ‘sliced’ through  
117 the target, thereby minimizing corrective hand actions.

118

119 **Figure 1.** Experimental paradigm  
 120 and illustrative trials. a, Participants  
 121 moved the tip of a hand-held stylus  
 122 across a horizontal surface to move  
 123 a cursor from a central start  
 124 position to a visual target presented  
 125 on a vertical monitor. In 1-target  
 126 trials, either a blue or a red target  
 127 was displayed and, in 2-target  
 128 trials, one blue and one red target  
 129 were displayed. Targets were  
 130 displayed on a visible ring  
 131 composed of 60 small circles. The  
 132 filled blue and red circles indicate  
 133 the 4 possible locations of the blue  
 134 and red targets on the left and right  
 135 sides of the ring, respectively. After  
 136 a preview period, either the single  
 137 target, or one of the two potential  
 138 targets was cued, providing the go  
 139 signal for the reach. In the rotation  
 140 phase of the experiment,  
 141 visuomotor rotations were applied,  
 142 requiring the participant to move  
 143 the stylus in a direction rotated 45°  
 144 CW or CCW from the blue or red  
 145 target, respectively, to bring the  
 146 cursor to the target. In Report-and-  
 147 Reach trials, the circles were  
 148 numbered and the participant had  
 149 to indicate the number of the circle  
 150 they intended to reach toward  
 151 before executing the reach. b, Gaze  
 152 paths (green circles) and hand  
 153 paths (cyan circles) from illustrative  
 154 1-target and 2-target reach trials in  
 155 the baseline phase (when no  
 156 rotations were applied). The paths  
 157 are shown from the time of target  
 158 presentation to the time the cursor  
 159 crossed the ring boundary. The  
 160 circled numbers indicate  
 161 successive fixations. c, Gaze and  
 162 hand paths from illustrative 1- and  
 163 2-target reach trials in the rotation  
 164 phase (when rotations were  
 165 applied).

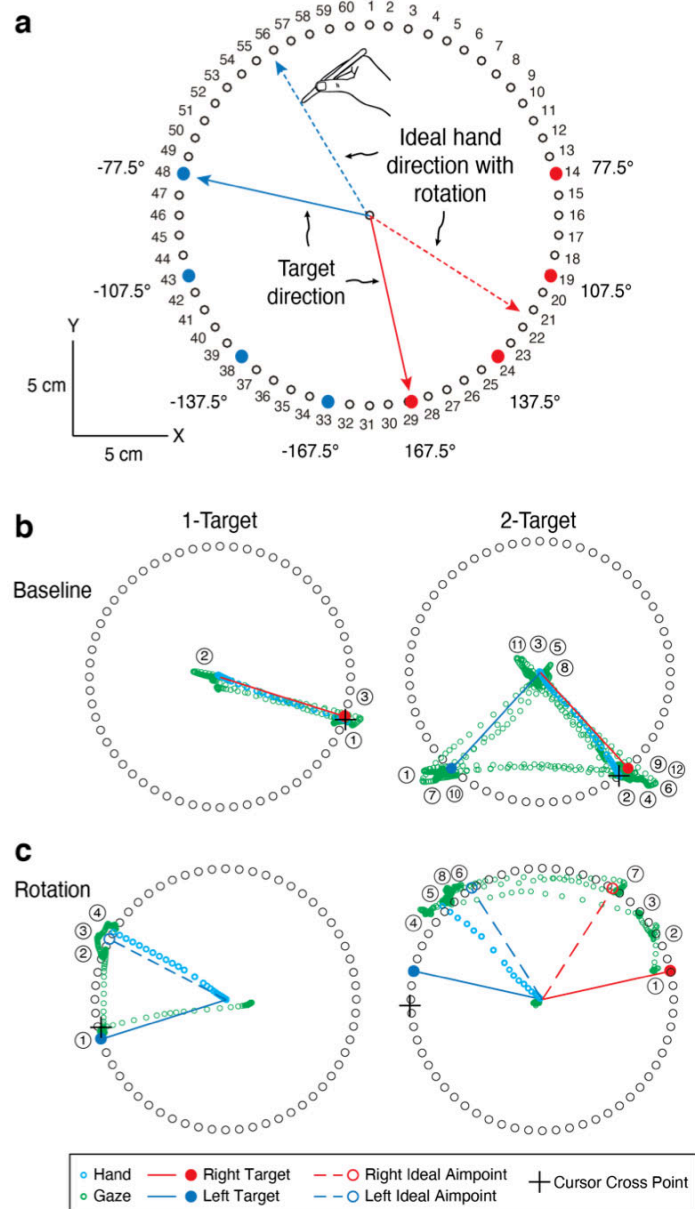

170 In the ‘report’ and ‘rotation’ phases of the experiment, we used visuomotor rotations to  
171 decouple the visual goal locations from the corresponding motor goal locations. This key  
172 manipulation, wherein the visual feedback of the cursor movement was rotated about the  
173 central start position, allowed us to distinguish gaze fixations tied to the location of the visual  
174 target(s) versus the location of the motor goal(s). The learning of visuomotor rotations has  
175 been shown to reflect the summation of two separate, but interacting components (Miyamoto  
176 et al., 2020; Taylor and Ivry, 2011). The explicit component constitutes a re-aiming strategy,  
177 wherein the hand is aimed away from the visual target, in the direction opposite of the  
178 rotation. This component has been shown to drive a fast change in hand movement direction  
179 early in the learning process (de Brouwer et al., 2018; Taylor et al., 2014). The implicit  
180 component, by contrast, involves the automatic (i.e., not under voluntary control) adaptation  
181 of the mapping between motor commands and their sensory consequences, resulting in  
182 gradual changes in hand movement direction during learning. In our task, visual feedback of  
183 the cursor was rotated about the hand start position by 45° clockwise (CW) in trials in which  
184 the red target was cued (i.e., for rightward movements), and by 45° counter clockwise (CCW)  
185 in trials in which the blue target was cued (i.e., for leftward movements). Thus, to  
186 successfully hit the target, the participant had to specify motor goal locations, via the explicit  
187 component, to move the stylus in a direction rotated 45° CCW or CW, respectively, from the  
188 target (see dashed lines in Fig. 1a). We used opposite rotations for the red and blue targets to  
189 limit implicit adaptation over the course of the experiment (Herzfeld et al., 2014; Wigmore et  
190 al., 2002). In addition, we sought to maximize the explicit component—and thus the  
191 separability of the motor goal location from the corresponding visual target location—by  
192 informing participants, after the first rotation trial with each of the target colours, that they  
193 could counteract the visuomotor rotation by aiming in a different direction than the visual  
194 target. To assess the contribution of the explicit component during the task, and provide a  
195 basis for interpreting gaze fixations associated with motor goal locations, we measured the  
196 magnitude of the explicit component in reach-and-report trials after the introduction of the  
197 rotation (see below).

198

199 Figure 1b shows gaze (green) and hand (blue) paths in illustrative 1- and 2-target reach trials  
200 taken from the baseline phase (with no rotations applied). The paths are shown from the  
201 preview period to the time the cursor crossed the ring. The circled numbers indicate  
202 successive gaze fixations—the locations of which correspond to dense regions on the green  
203 path—following the initial fixation at the start location. In this example 1-target trial, the  
204 participant fixated the visual target (fixation 1), then the center start location (fixation 2), and  
205 then the target again during the preview period (fixation 3), where it remained during the  
206 reach. In the 2-target trial, gaze shifted between the center start location and each potential  
207 target, as well as between the two potential targets, before shifting to the cued target (fixation  
208 12), where it remained during the reach.

209

210 Figure 1c shows corresponding gaze and hand paths in illustrative 1- and 2-target reach trials  
211 taken from the rotation phase. In the 1-target trial, gaze was initially directed to the visual  
212 target (fixation 1) and then shifted, over several fixations (fixations 2 to 4), towards the  
213 participant's explicit aimpoint, rotated ~45° CW from the blue target. This gaze behaviour is



214 consistent with previous work using a similar paradigm and demonstrates encoding of the  
215 hand movement (i.e., motor) goal, in addition to the visual goal (i.e., the target) prior to  
216 movement (de Brouwer et al., 2018). In the 2-target trial, gaze initially shifted to the red  
217 target (fixation 1) before shifting (fixations 2 and 3) towards the red aimpoint rotated  $\sim 45^\circ$   
218 CW. (Note that there is no gaze path from the central fixation point to the first fixation  
219 because the participant blinked during this gaze shift.) Although participants often fixated  
220 both visual targets, in this trial gaze then shifted midway between the blue target and blue  
221 aimpoint rotated  $45^\circ$  CCW (fixation 4) before shifting (fixations 5 and 6) toward the blue  
222 aimpoint. Gaze then shifted between the two aimpoints (fixations 7 and 8) suggesting that the  
223 motor goal locations associated with each potential target were being held in memory (see  
224 below) until the blue target was cued.

### 225 ***Reaching and Reporting Behaviour***

226 Figure 2a shows, for a representative participant, the hand angle, relative to the cued target, at  
227 the moment the cursor crossed the ring, as a function of trial number in the baseline, report,  
228 rotation, and no feedback phase of the experiment. The symbols show individual trials, and  
229 the vertical blue and red lines show separate averages for blue and red targets, respectively.  
230 In the baseline phase, containing 64 intermixed 1- and 2-target trials, reaches were directed to  
231 the cued target (i.e., errors are distributed around  $0^\circ$ ).

232  
233 Upon completion of the baseline phase, visuomotor rotations of  $-45^\circ$  and  $+45^\circ$  were applied  
234 during reaches to the blue and red targets, respectively. To measure and facilitate the  
235 implementation of an explicit re-aiming strategy, participants then completed a series of  
236 report-and-reach trials (Taylor et al., 2014). In these trials, the numbers 1 to 60 were  
237 displayed next to the circles of the ring (Fig. 1a). In 1-target report-and-reach trials,  
238 participants were asked to report the number of the circle they intended to aim towards in  
239 order to move the cursor to the target. In 2-target report-and-reach trials, they were asked to  
240 report, for each potential target, the number of the circle they intended to reach towards if that  
241 target were selected (i.e, they reported two numbers). After the participant reported the target  
242 number(s), one target was cued and the participant executed the reach to that target.  
243 Participants completed a block of eight 1-target report-and-reach trials for each target color,  
244 followed by 32 intermixed red- and blue-cued 1- and 2-target report-and-reach trials. Our  
245 analysis of the report phase focused on the latter 32 trials, where the explicit component has  
246 largely stabilized.

247  
248 As illustrated in Figure 2a (Report), the representative participant successfully counteracted  
249 the rotation by moving their hand approximately  $+45^\circ$  and  $-45^\circ$  away from the blue and red  
250 targets, respectively (thus moving the cursor to the target). Figure 2b shows that the  
251 aimpoints verbally reported by this participant were rotated approximately  $\pm 35^\circ$  from the  
252 target, indicating that they primarily counteracted the visuomotor rotation through the use of  
253 an explicit re-aiming strategy, with the remainder (approximately  $\pm 10^\circ$ ) being achieved  
254 through implicit adaptation (Taylor et al., 2014).

255

256 **Figure 2.** Reach and  
257 reporting behaviour of a  
258 representative participant (a,  
259 b), and across participants (c,  
260 d). a, Hand angle, relative to  
261 the cued target, at the  
262 moment the cursor reached  
263 the ring, in each trial in the  
264 four successive phases of the  
265 experiment. Symbols show  
266 individual trials with the colour  
267 indicating the cued target and  
268 the shape indicating the  
269 number of targets displayed.  
270 Vertical red and blue lines  
271 show the average across  
272 trials in which the red or blue  
273 target was cued, respectively.  
274 b, Verbally reported intended  
275 aiming direction in report-and-  
276 reach trials during the report  
277 phase of the experiment.  
278 Symbols and lines as in a. c,  
279 To combine the data across  
280 the opposing rotations, we  
281 computed adjusted hand,  
282 report, and fixation angles by  
283 negating the angles for the  
284 red targets. The left panel  
285 shows the mean adjusted  
286 hand angle, based on  
287 participant averages (dots), in  
288 the baseline, rotation, and no  
289 feedback phases. The middle  
290 panel shows the mean  
291 adjusted verbally reported  
292 angle in the report phase. The  
293 right panel shows the mean  
294 adjusted fixation angle, based  
295 on participant modes (dots), in  
296 the baseline, rotation, and no  
297 feedback phases. Short  
298 horizontal purple bars and  
299 shading show the group mean  
300  $\pm 1$  standard error. d, Linear  
301 relationship between adjusted  
302 fixation angle and adjusted  
303 report angle. Dots represent  
304 individual participants; the  
305 purple line shows the best  
306 linear fit to the participant data.  
307

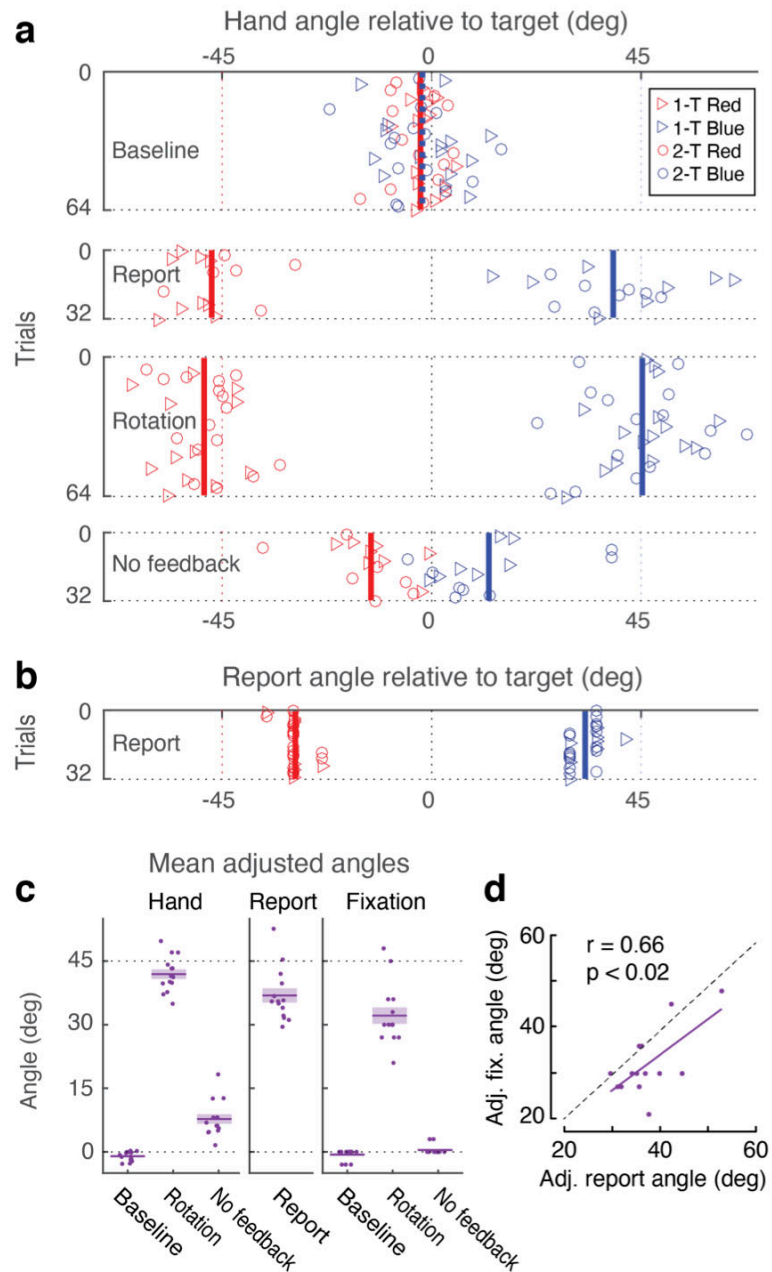

308 Following the report-and-reach trials, participants completed 64 reach trials with the  
309 visuomotor rotations applied, but without the numbering of the ring of circles and the  
310 reporting procedure. As illustrated in Figure 2a (Rotation), the representative participant  
311 successfully moved the cursor to the targets by reaching  $+45^\circ$  and  $-45^\circ$  away from the blue  
312 and red targets, respectively.

313  
314 After the rotation phase, participants completed an additional 32 reach trials in which visual  
315 feedback of the cursor was removed (no feedback phase). In these trials, participants were  
316 told that the rotation was now turned off and were instructed to reach directly to the target  
317 when it was cued, allowing for the measurement of implicit adaptation (Taylor et al., 2014).  
318 As shown in Figure 2a (No feedback), this implicit component (or after-effect) was  
319 approximately  $\pm 10^\circ$  in our representative participant. This is consistent with the observation  
320 that the reported aiming angle was  $\pm 35^\circ$ , summing up to a hand angle of  $\pm 45^\circ$ , and indicates  
321 that the magnitude of the explicit component was preserved throughout the rotation phase.

322  
323 To combine the data across the two opposing rotations, we computed, for each participant,  
324 adjusted hand and report angles by negating the angles for the red targets. Figure 2c shows  
325 the mean adjusted hand angle, based on participant averages, in the baseline, rotation, and no  
326 feedback phases, as well as the mean adjusted verbally reported angle in the report phase.  
327 The report angle ( $M = 36.9^\circ$ ;  $SE = 1.7^\circ$ ) and the aftereffect in the no feedback phase at the  
328 end of the experiment ( $M = 7.8^\circ$ ;  $SE = 1.1^\circ$ ) summed to approximately  $45^\circ$ , as shown above  
329 for our representative participant. This finding indicates that the magnitude of the explicit  
330 component remained consistent throughout the 64 trials of the rotation phase. (Note that the  
331 right side of Fig. 2c and Fig. 2d, which describes gaze behaviour during the task, will be  
332 described below.)

### 333 *Spatial Distributions of Fixations*

334 Figure 3a shows, for the same representative participant shown in Figure 2a, the angle,  
335 relative to the closest target, of all fixations during the target preview period as a function of  
336 trial number and phase. (Note that there were often multiple fixations in a given trial.) As  
337 illustrated in the figure, during both baseline and no feedback reach trials, fixations were  
338 directed close to the visual target(s). During the rotation phase, however, a large proportion  
339 of fixations—in both 1-target (triangles) and 2-target (circles) trials—were directed close to  
340 the reported aimpoints that this participant had previously reported in the report phase (red  
341 and blue vertical lines, also shown in Fig. 2b). Figure 3b shows, for the same participant, the  
342 distribution of fixation time as a percentage of total fixation time (including central fixations)  
343 during the preview period, at each fixation angle ( $6^\circ$  bins), for both the baseline and rotation  
344 phases. Separate distributions are shown for 1-target and 2-target trials and for fixations  
345 closest to the blue and red targets. It is clear that in the baseline phase, this participant spent  
346 most time fixating near the visual target, while in the rotation phase some time was spent near  
347 the visual target, but most time was spent fixating near the ‘aimpoint’. To combine the data  
348 across the two potential targets, we computed the adjusted fixation angle by negating the  
349



350  
351  
352  
353  
354  
355  
356  
357  
358  
359  
360  
361  
362  
363  
364  
365  
366  
367  
368  
369  
370  
371  
372  
373  
374  
375  
376  
377  
378  
379  
380  
381  
382  
383  
384  
385  
386  
387  
388  
389  
390  
391  
392  
393  
394  
395  
396  
397  
398

**Figure 3.** Gaze behaviour. a-c, Results from the same representative participant shown in Fig. 2. a, Angle, relative to the closest target, of all fixations during the preview period. Symbols show individual trials with the colour and shape indicating the closest potential target and the number of targets displayed, respectively. b, Percentage of total fixation time during the preview period in the baseline and rotation phases as a function of fixation angle ( $6^\circ$  bins), with separate distributions shown for 1- and 2-target trials and for fixations assigned to the blue and red targets. c, Percentage of preview fixation time in the baseline and rotation phases as a function of adjusted fixation angle (computed by negating the angle for the red targets), with separate distributions shown for 1- and 2-target trials. Data combined across blue and red targets. d, Means, averaged across participants, of the distributions shown in c. Height of the shaded regions represents  $\pm 1$  standard error.

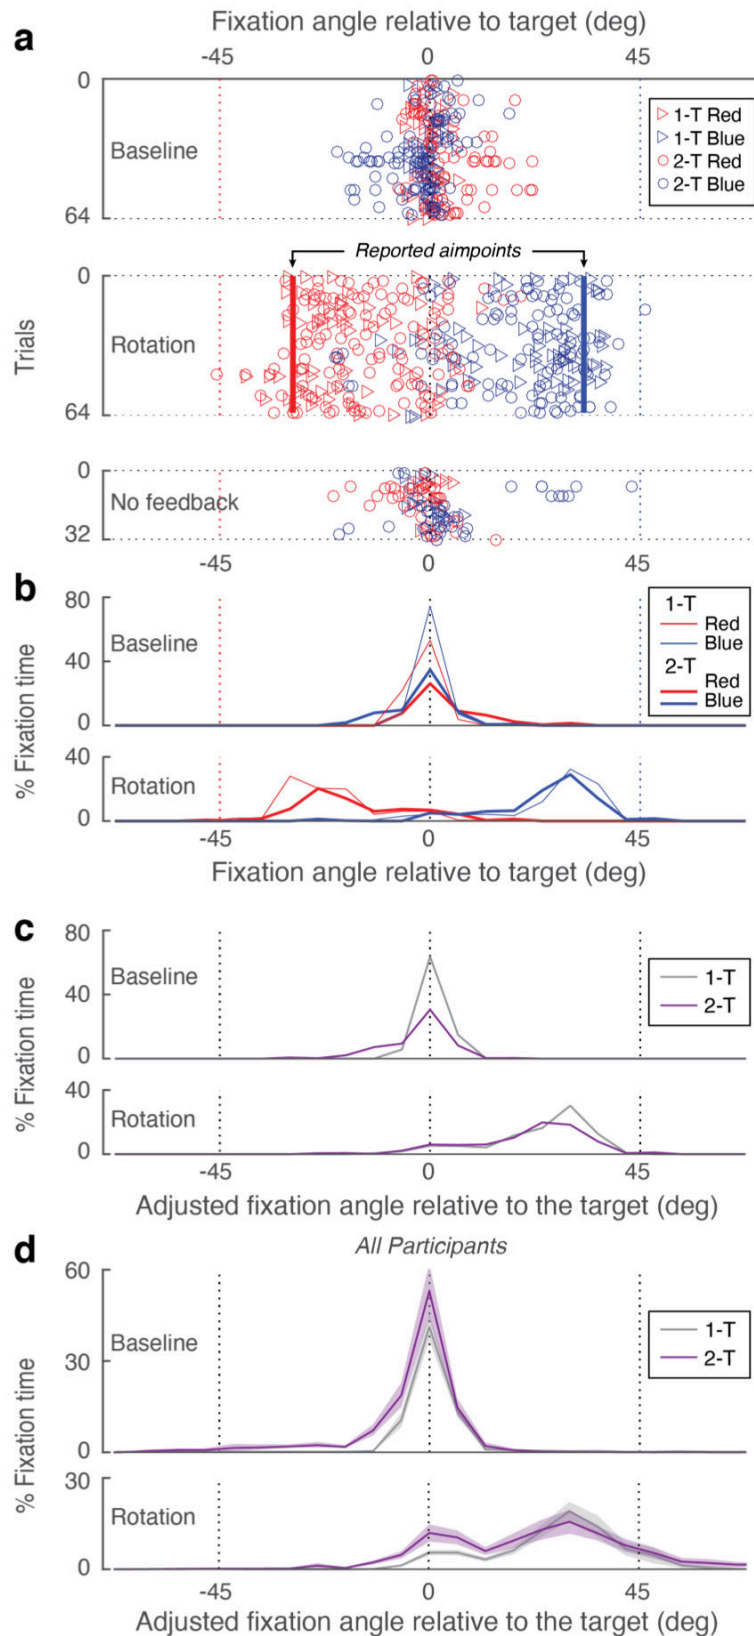

399 angle for the red target. Figure 3c shows, for both phases, the percentage of preview fixation  
400 time as a function of adjusted fixation angle, with separate distributions shown for 1- and 2-  
401 target trials. Figure 3d shows the distribution of preview fixation time as a function of  
402 adjusted fixation angle, averaged across participants. Whereas a single peak at the target ( $0^\circ$ )  
403 was observed in the baseline phase, two separate peaks, one at the visual target and one in the  
404 vicinity of the aimpoint, were observed in the rotation phase.

405  
406 Next, we determined the location of the peak (or mode) of the fixation time distribution for  
407 each participant and phase (baseline, rotation and no feedback), combining 1- and 2-target  
408 trials. These modes, along with the mean across participants, are shown in the right panel of  
409 Figure 2c to allow for direct comparison with the reaching and report data (discussed above)  
410 over the same phases of the task. Note that the mean modal fixation angle during the rotation  
411 phase ( $M = 31.7^\circ$ ;  $SE = 2.2^\circ$ ) was slightly smaller than the mean reported aimpoint in the  
412 report phase ( $M = 36.9^\circ$ ,  $SE = 1.7^\circ$ ). This difference is likely due to the fact that our analysis  
413 considers all gaze fixations during the preview period and that gaze tended to shift, over two  
414 or more fixations, from the target towards the aimpoint (as illustrated in Fig. 1c). Importantly,  
415 across participants, the mean fixation angle during the rotation phase correlated with the  
416 mean verbally reported aimpoint during the Report phase (Fig. 2d). Together, these findings  
417 indicate that participants' gaze behaviour provides a good covert indicator of their explicit re-  
418 aiming strategy, and thus the specification of motor goals prior to target selection.

#### 419 ***Time Course of Within Trial Fixations***

420 To investigate the temporal pattern of gaze fixations during target preview and reach  
421 execution of trials in the rotation phase, we defined three spatial zones: a central zone, a  
422 target zone, and an aimpoint zone (see inset in Fig. 4; note that in 2-target trials, there were  
423 two target zones and two aimpoint zones). Figure 4 displays the time-varying probability,  
424 within a trial, of fixating within each of the zones, averaged across participants. The initial  
425 sequence of fixations was similar in 1- and 2-target trials. Participants typically fixated the  
426 central starting point (orange trace) at the beginning of the trial. After about 300 ms, the  
427 probability of fixating the target(s) (black trace) increased sharply and, after about a further  
428 200 ms, the probability of fixating the aimpoint(s) (green trace) increased. In 1-target trials,  
429 the probability of fixating in the aimpoint zone remained high until the end of the preview  
430 phase. In contrast, in 2-target trials the probability of fixating the aimpoint decreased while  
431 the probability of fixating the central zone increased, presumably to 'wait' until one of the  
432 two potential targets was cued. Towards the end of the reaction time interval, and throughout  
433 the movement time interval, the probability of fixating the target increased, presumably to  
434 verify the landing position of the cursor relative to the target. In summary, although the time  
435 course of zone fixations differed somewhat between 1- and 2-target trials, in both types of  
436 trials gaze was often directed to the aimpoint zone(s) during the preview period.

#### 437 ***Target and Aimpoint Fixation Probabilities***

438 Having established that fixations observed within the aimpoint zone indicate the specification  
439 of motor goals, a key question is how frequently participants fixated aimpoint zones. Figures

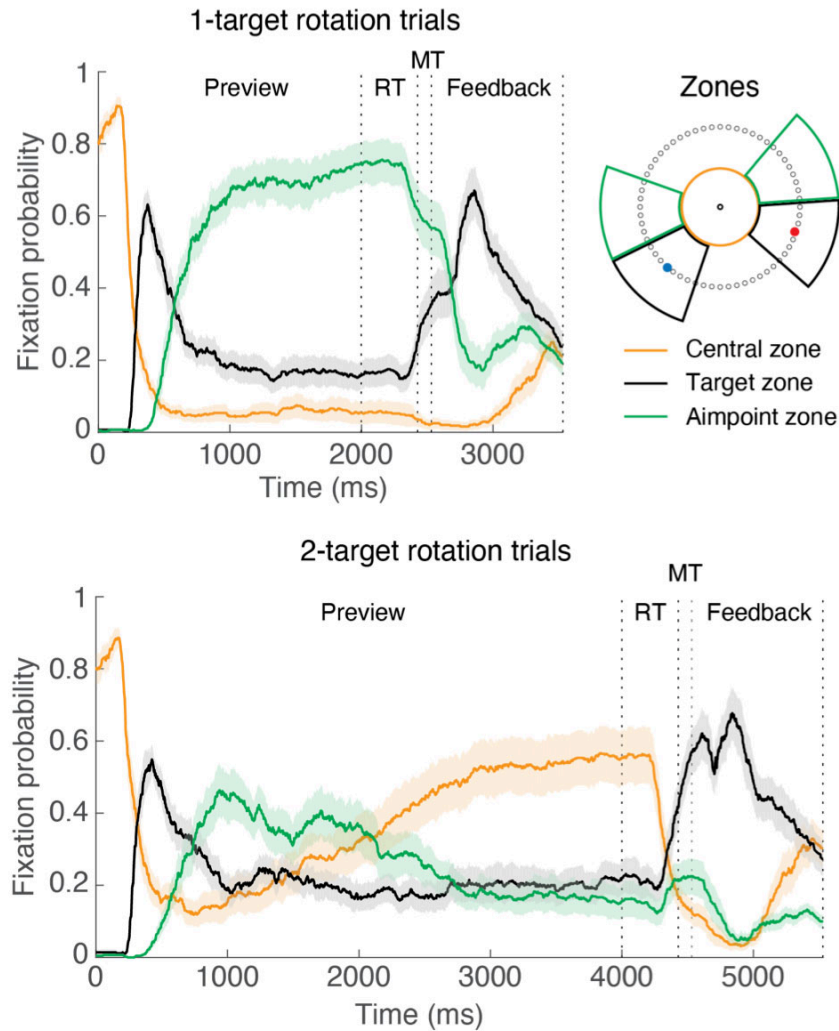

440  
441  
442  
443  
444  
445  
446  
447

**Figure 4.** Time course of within trial fixations. Time varying probability of fixating within the target, aimpoint, and central zones in 1-target (top) and 2-target (bottom) trials. The traces represent means, averaged across participants, and the shaded regions represent  $\pm 1$  standard error. The reaction time (RT) and movement time (MT) intervals are normalized to the median durations across all included trials, averaged across participants.

448 5a and b show the frequency with which participants fixated within the target and aimpoint  
449 zones in the baseline and rotation phases of the experiment, respectively. Note that these plots  
450 express fixation frequency as a percentage of the total number of targets. In the baseline  
451 phase (Fig. 5a), participants almost always fixated the target zone in 1-target trials and fixated  
452 the majority ( $M=81\%$ ;  $SE=4\%$ ) of target zones in 2-target trials. As expected, participants  
453 very rarely fixated the aimpoint zone—as defined for the rotation phase—in the baseline  
454 phase, indicating that aimpoint zone fixations during the rotation phase are task-specific. In  
455 the rotation phase of the experiment (Fig. 5b), the probability of fixating target zones was a  
456 little lower than in the baseline phase zones. However, even in 2-target trials, participants  
457 fixated 65% ( $SE=5\%$ ) of the target zones, and thus often fixated both potential targets during  
458 the delay period. On average, the frequency with which participants fixated the aimpoint  
459 zones ( $M=57\%$ ;  $SE=7\%$ ) was comparable to the frequency with which they fixated the target

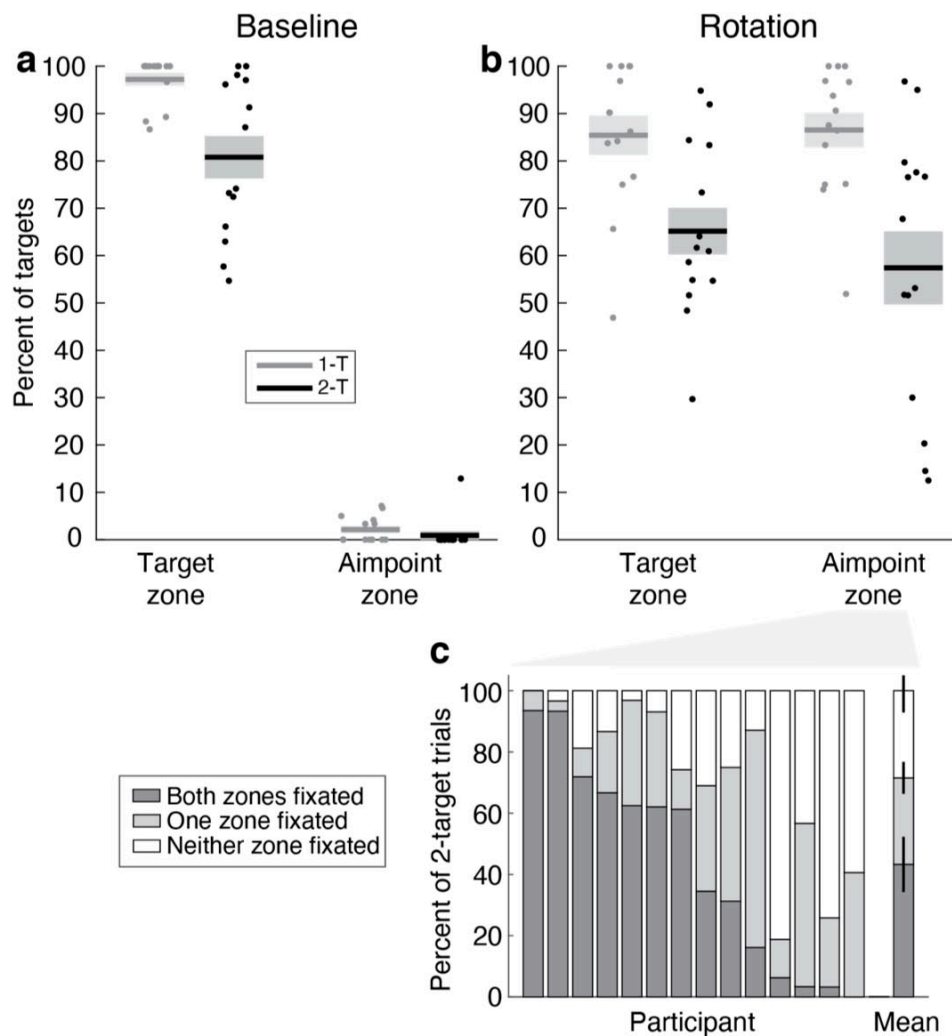

460  
461 **Figure 5.** Target and aimpoint fixation probabilities, as a percentage of the total number of targets. a,  
462 Probabilities of fixating the target and aimpoint zones in 1-target (1-T) and 2-target (2-T) trials in the  
463 baseline phase, expressed as a percentage of the total number of targets in each phase. b,  
464 Corresponding percentages for the rotation phase. Each dot represents the data of an individual  
465 participant and the horizontal lines and shaded areas depict group means  $\pm$  1 standard error of the  
466 mean. c, Probability, expressed as a percentage of all 2-target trials, that a fixation occurred in both,  
467 one, or none of the aimpoint zones in the rotation phases, for each participant and the average across  
468 the group, where the heights of the vertical lines represents  $\pm$  1 standard error.

469

470 zones, although there was considerable variability across participants in 2-target trials. Thus,  
471 in the rotation phase, aimpoint locations (i.e., motor goals) and visual target location (i.e.,  
472 visual goals) became similarly salient on average.

473

474 To test whether participants specified single or multiple motor goals prior to target selection,  
475 we examined how often, in 2-target trials during the rotation phase, participants fixated both  
476 aimpoint zones, only one aimpoint zone, or neither aimpoint zone. Figure 6c shows the

477 probability, for each individual participant as well as for the group, that a fixation occurred in  
478 both, one, or none of the aimpoint zones, expressed as a percentage of 2-target trials. We  
479 found that the relative frequency of the three aimpoint encoding strategies varied markedly  
480 across participants. Thus, half of the participants fixated in both aimpoint zones in the  
481 majority (>60%) of 2-target trials, whereas the other half of the participants were more likely  
482 to fixate in one or neither of the aimpoint zones. Importantly, most individual participants  
483 exhibited a mixture of encoding strategies across trials. This variability both within and  
484 across participants challenges that notion that any single model—i.e., parallel specification  
485 (e.g., Cisek, 2012), stay-or-switch (Dekleva et al., 2018) or serial—can account for  
486 participant behaviour.

### 487 *Aimpoint Zone Re-Visits*

488 Although fixating both aimpoint zones during the preview period is consistent with the idea  
489 that two competing motor goals are specified and then held in memory until the reach is cued,  
490 an alternative interpretation is that participants encoded each motor goal sequentially such  
491 that the first motor goal is replaced in memory when the participant opts to encode the other  
492 motor goal. We found that, during the preview period, gaze often ‘visited’ a given aimpoint  
493 zone two, and occasionally three, times, where each visit could involve several fixations. To  
494 test whether participants maintained previously encoded motor goals in memory, we carried  
495 out two analyses that compared gaze behaviour, in 2 target trials, associated with initial visits  
496 and gaze behaviour associated with re-visits.

497  
498 We first examined the location from which participants launched eye movements to bring  
499 gaze into an aimpoint zone. As shown in Fig. 6a, the first aimpoint zone visit (present in 68%  
500 of trials) was most often preceded by a fixation in the corresponding visual target zone (72%  
501 of cases), suggesting that the motor goal location was derived (and specified immediately)  
502 following the visual target location. However, the second and third visits to the aimpoint zone  
503 (present in 47 and 27% of trials, respectively) were most often preceded by a fixation in the  
504 aimpoint zone for the other target (47 and 58% of cases, respectively). This result suggests  
505 that, after participants initially fixated a given aimpoint, they kept that motor goal location in  
506 memory such that they could return their gaze directly to it without having to first fixate the  
507 corresponding visual target.

508  
509 The second analysis focused on trials in which gaze visited a given aimpoint zone and then  
510 re-visited that zone after visiting the *other* aimpoint zone in between. As noted above, we  
511 observed that on the first visit to a given aimpoint zone, the initial or ‘entry’ fixation tended  
512 to undershoot the ideal aimpoint, and was followed by one or two additional saccades that  
513 brought gaze closer to the ideal aimpoint (see Fig. 1c). This gaze behaviour presumably arises  
514 from a stepwise process engaged in determining the aimpoint relative to the visual target. In  
515 contrast, we observed that when the aimpoint zone was re-visited, with an intervening visit to  
516 the other aimpoint, the entry fixation tended to be close to the ideal aimpoint (also illustrated  
517 in Fig. 1c). If substantiated, these observations would suggest that the first motor goal was  
518



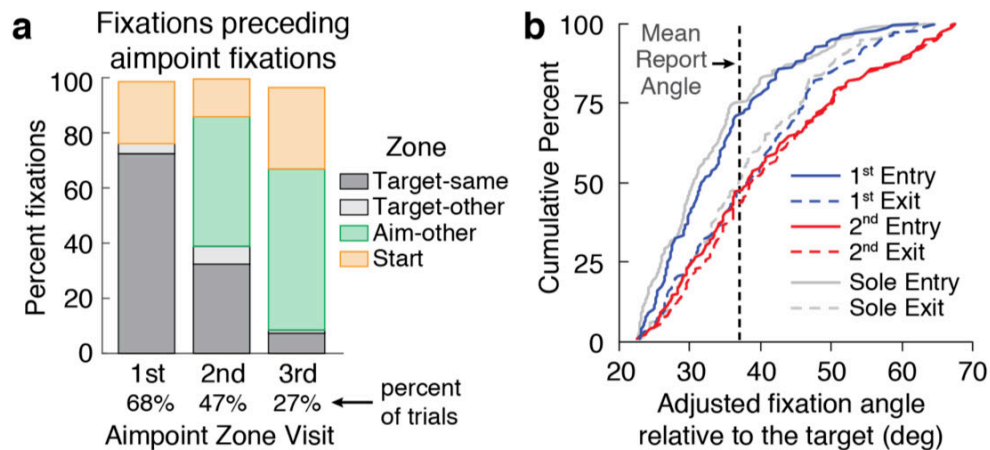

519  
520

521 **Figure 6.** Aimpoint re-visits in 2-target trials. a, Probability that the fixation preceding the first, second,  
522 and third gaze visits to a given aimpoint zone was in the corresponding target zone, other target zone,  
523 other aimpoint zone, and start zone. b, Cumulative distributions of the entry (solid traces) and exit  
524 (dashed traces) fixation angles for the first (blue) and second (red) visits to a given aimpoint zone in  
525 instances in which the zone was visited and then revisited after visiting the other aimpoint zone.  
526 Corresponding gray traces show distributions of the sole entries and exits of a aimpoint zone in  
527 instances in which that zone was visited once.

528

529 kept in memory when the second motor goal was encoded, and that, therefore, both motor  
530 goals were maintained simultaneously in memory.

531

532 To test the hypothesis that participants can hold *two* motor goals in memory, we selected  
533 instances (N=132), from 2-target trials in the rotation phase, in which, during the preview  
534 period, gaze visited (i.e., entered and exited) a given aimpoint zone and then re-visited that  
535 aimpoint zone after having visited the other aimpoint zone. The solid blue trace in Fig. 6b  
536 shows the distribution of fixation angles (relative to the target) of the first fixation when gaze  
537 visited an aimpoint zone for the first time (1<sup>st</sup> entry). The dashed blue trace shows the  
538 fixation angle of the last fixation before gaze then exited the aimpoint zone for the first time  
539 (1<sup>st</sup> exit). The median fixation angles of the 1<sup>st</sup> entry and 1<sup>st</sup> exit were 31.8° and 38.2°,  
540 respectively, consistent with the observation that gaze traversed the aimpoint zone during the  
541 first visit. Note that the median exit angle is closer to the mean report angle (36.9°; vertical  
542 dashed line) than the median entry angle, suggesting that, during the first visit, participants  
543 were actively determining the desired aimpoint location.

544

545 The solid and dashed red traces show the distributions of fixation angles for the 2<sup>nd</sup> entry and  
546 2<sup>nd</sup> exit; i.e., the first and last fixations for the second visit to the same aimpoint zone. In  
547 contrast to the first entry and exit angles, both these had medians (38.2 and 38.8°,  
548 respectively) which were close to the fixation angle of the 1<sup>st</sup> exit as well as the mean verbal  
549 report angle. This suggests that having visited the aimpoint once, the location was held in  
550 memory and used to guide gaze when revisiting the aimpoint zone. Kolmogorov-Smirnov

551 tests revealed that the distributions of entry and exit fixation angles were significantly  
552 different ( $p < 0.001$ ) for the first aimpoint zone visit but not the second visit ( $p = 0.29$ ). For  
553 completeness, we also examined instances, from 2-target trials in the rotation phase, in which  
554 an aimpoint was only entered and exited once ( $N = 168$ ). The solid and dashed gray traces in  
555 Fig. 6b show the distributions of these sole entries and exits. The median entry and exit  
556 fixation angles were  $30.6^\circ$  and  $37.0^\circ$ , respectively, again indicating that when first visiting an  
557 aimpoint zone, gaze tended to arrive short of the actual aimpoint and then traversed the zone  
558 towards this aimpoint. These results provide strong evidence that participants stored motor  
559 goals in memory after encoding them, and that encoding a second motor goal does not  
560 interfere with memory of the first motor goal. Thus, the results indicate that participants  
561 could, and often did, maintain two motor goals in memory at the same time.

## 562 Discussion

563 To investigate how the brain represents competing reach options under target uncertainty, we  
564 measured participant's gaze behaviour while viewing two potential targets, one of which was  
565 cued as the reach target after a preview period. Critically, we applied opposing visuomotor  
566 rotations to the two targets so that we could dissociate eye fixations related to the visual  
567 location of each target from eye fixations related to the motor goal location; i.e., the location  
568 that participants aimed their hand toward in order to bring the rotated cursor, controlled by  
569 the hand, to the target. We found that, during the preview period, participants generally  
570 fixated the visual targets. In terms of motor goal locations, we found that individual  
571 participants exhibited a mixture of gaze strategies, across trials, whereby they either fixated  
572 both motor goal locations, one of these locations, or neither motor goal location during the  
573 preview period. Analysis of gaze behaviour in trials in which gaze re-visited a given motor  
574 goal location after visiting the other motor goal location indicated that both motor goals were  
575 simultaneously retained in memory during the preview period. These results provide evidence  
576 that, at the level of single trials, the brain often encodes multiple motor goals prior to target  
577 selection, but may also encode either one or no motor goals.

578  
579 To date, research examining the encoding of competing targets of action has tended to argue  
580 exclusively for one of three models: the parallel specification model (Cisek, 2007; Cisek and  
581 Kalaska, 2005; Thura and Cisek, 2014), the stay-or-switch model (Dekleva et al., 2018), and  
582 traditional serial models (McClelland, 1979; Sternberg, 1969). In the context of delayed reach  
583 tasks in which two potential targets are presented, these models posit that, prior to target  
584 selection, motor goals are specified for both potential targets, a single potential target, or  
585 neither potential target. Our finding that, across trials, individual participants employ a  
586 mixture of encoding strategies—variously specifying two, one or no motor goals prior to  
587 target selection—challenges the notion that any single model can account for how the brain  
588 represents competing reach options. The choice of strategy at a particular moment in time  
589 may depend on a number of factors including attentional and motivational states, the  
590 cognitive effort and memory demands involved in specifying motor goals, and real or  
591 perceived benefits associated with advance motor goal specification (Cisek and Kalaska,  
592 2010; Gallivan et al., 2016a, 2015; Thura and Cisek, 2014).

593

594 It is important to note that the frequency with which aimpoint zones were *fixated* may  
595 underestimate the frequency with which motor goals were actually *specified* during the  
596 preview period. Whereas an aimpoint zone fixation during the preview period provides  
597 evidence that the corresponding motor goal was specified prior to target selection, the  
598 absence of an aimpoint fixation does not necessarily imply that the motor goal was not  
599 specified using peripheral vision. In our previous study in which only single targets were  
600 presented during the preview period (de Brouwer et al., 2018), we observed that participants  
601 who fixated the motor goal exhibited fast learning consistent with the implementation of an  
602 explicit strategy whereby they specified, and aimed toward, the motor goal. In contrast, most  
603 of the participants who did not fixate the motor goal during the preview period exhibited  
604 more gradual learning consistent with implicit adaptation without explicit motor goal  
605 specification. However, a couple of participants exhibited explicit learning without fixating  
606 the aimpoint, indicating that they specified, and aimed toward, the motor goal without  
607 fixating it. Thus, we may be underestimating the frequency of trials in which both motor  
608 goals were specified.

609

610 The idea that participants can flexibly use different encoding strategies has implications for  
611 interpretations from previous neurophysiological studies. For example, in their study  
612 examining the encoding of potential reach targets, Dekleva and colleagues (2018)  
613 simultaneously recorded activity from populations of neurons in dorsal premotor cortex  
614 during a delayed response task. They tested how well their data were fit by single and dual  
615 target encoding models and concluded that, at the level of single trials, only one or two  
616 response options was represented at a time during the delay period. However, their analyses,  
617 perhaps necessarily, did not consider the possibility of flexible encoding, which, as we have  
618 shown in the current study, may be quite variable across participants.

619

620 We found that, in 2-target trials, participants often fixated both aimpoint zones during the  
621 preview phase. One interpretation of this gaze behaviour is that both motor goals are encoded  
622 and maintained in memory prior to target selection. However, an alternative interpretation is  
623 that participants forget the motor goal associated with the previously fixated aimpoint when  
624 they fixate the other aimpoint, effectively switching which motor goal is held in memory.  
625 Importantly, our analysis of aimpoint zone visits and re-visits provides strong support for the  
626 former interpretation. We found that when gaze first visited a given aimpoint zone, this was  
627 typically preceded by a fixation of the corresponding target. This suggests that participants  
628 actively determined the motor goal location relative to the target location. In contrast, we  
629 found that when gaze re-visited a given aimpoint zone, the initial fixation in the zone was  
630 most often preceded by a fixation of the other aimpoint. This suggests the motor goal  
631 location, specified during the first visit, was kept in memory such that the participant did not  
632 have to re-fixate the visual target in order to locate the motor goal.

633

634 Critically, we also found that when, during the preview period, gaze re-visited a given  
635 aimpoint zone after visiting the other aimpoint zone, the entry fixation was far closer to the  
636 verbally reported aimpoint than the entry fixation on the first visit to that aimpoint zone. (The

637 latter tended to undershoot the reported aimpoint and was followed by one or more saccades  
638 that brought gaze toward the reported aimpoint.) This result provides strong evidence that  
639 participants encoded and remembered motor goal locations, even after subsequently encoding  
640 the other motor goal location, and thus could hold two motor goals in memory while waiting  
641 for one of the potential reach targets to be cued. We suggest that aimpoint re-visits, which  
642 often involved alternating fixations between aimpoints, may be akin to rehearsal strategies  
643 that people employ to maintain items in working memory (Baddeley, 2007; Baddeley and  
644 Hitch, 1974). From this perspective, re-visits can be viewed as serving to maintain and  
645 reinforce multiple motor goal locations in memory.

646

647 In visually guided actions, task-specific proactive eye movements are crucial for planning  
648 and control (Johansson et al., 2001; Land et al., 1999; Land and McLeod, 2000) and may be  
649 viewed as an integral component of the overall motor program for the task (Flanagan et al.,  
650 2013; Flanagan and Johansson, 2003; Land and Furneaux, 1997; Rotman et al., 2006).  
651 Moreover, information gained through task-specific eye movements need not be used  
652 immediately to guide action, but can be buffered for use in guiding forthcoming actions  
653 (Land and Furneaux, 1997; Land and Lee, 1994; Land and Tatler, 2009). In our task, a  
654 fixation of an aimpoint or motor goal, during the preview period, can thus be viewed as a key  
655 component to specifying the potential reaching movement to the corresponding target. In  
656 principle, fixating an aimpoint can provide both visual and extra-retinal (i.e., gaze-related  
657 proprioceptive or efference copy signals) information about the location of the intended  
658 spatial goal of the hand movement that may be required (Prablanc et al., 1986, 1979; Prablanc  
659 and Martin, 1992). Note that although the aimpoint was ~10 degrees away from the location  
660 to which the hand was directed due to implicit adaptation, there is evidence that gaze-related  
661 signals may still be used to guide the hand when fixating a location that is close to the hand's  
662 target (Neggers and Bekkering, 2001). Moreover, it is possible that the processing of gaze-  
663 related signals for hand guidance incorporates implicit adaptation.

664

665 We have argued that fixating the aimpoint associated with a potential target, during the  
666 preview phase, is tantamount to specifying or encoding the motor goal associated with that  
667 target. Whereas many authors, including ourselves, have previously suggested that potential  
668 reaching movements are 'planned' in advance of target selection, we recognize that motor  
669 goal specification should not be equated with movement planning. The latter involves a  
670 number of components, ranging, depending on the theoretical account, from trajectory  
671 specification and optimization (Flash and Hogan, 1985; Harris and Wolpert, 1998) to the  
672 setting of feedback gains to optimize feedback control (Scott, 2004; Todorov, 2004; Todorov  
673 and Jordan, 2002). We cannot know, based on gaze behaviour, the extent to which such  
674 processes are completed, in advance, for each potential action. However, all accounts of  
675 movement planning and control involve motor goal specification.

676

677 In summary, we have provided evidence based on gaze behaviour in a delayed reaching task  
678 with two potential targets, that participants employed a mixture of strategies whereby, across  
679 trials, they may specify motor goals for both targets, one target, or neither target prior to  
680 target selection. This finding challenges theoretical accounts that have assumed that

681 participants inflexibly use a single encoding strategy when confronted with competing  
682 potential targets.

## 683 **Methods**

### 684 *Participants*

685 Fifteen participants ( $M_{\text{age}} = 20.5$ ,  $SD_{\text{age}} = 1.0$ ; 13 women) were recruited from the student  
686 population at Queen's University and provided written informed consent prior to completing  
687 the experiment. All participants were right-handed as verified by the Edinburgh Handedness  
688 Inventory (Oldfield, 1971) and were compensated \$10 CAD for their time. The Queen's  
689 University General Ethics Board approved all experimental procedures. A target sample size  
690 of 14-16 participants was specified in advance based on previous studies examining eye  
691 movements in action tasks, and our expectation that, if the main experimental effect is  
692 present, it should be observed at the single-subject level in nearly all participants. One  
693 participant was excluded from all analyses because they rarely moved their gaze from the  
694 central starting position during the trial (i.e., both the preview and execute periods), even in  
695 the baseline condition. Thus, their gaze behaviour could not be used to examine whether, or  
696 not, they prepared movements in advance initiating reaches.

### 697 *Apparatus*

698 Participants made center-out reaching movements to visual targets by moving the tip of a  
699 hand-held stylus across a horizontal digitizing tablet (active area 31.1 x 21.6 cm; Wacom  
700 Intuos PTH-851, Wacom, Kazo, Sataima, Japan). All visual stimuli were presented on a  
701 vertical computer monitor (display size 47.5 x 26.5 cm; resolution 1920 x 1080 pixels;  
702 refresh rate 60 Hz). The participant's head was supported by a chin and forehead rest placed  
703 ~50 cm in front of the monitor (10 cm on the screen corresponded to ~11.3 degrees of visual  
704 angle). The position of the tip of the stylus was sampled at 100 Hz and the participant's view  
705 of their hand was occluded. Movements of the right eye were recorded at 500 Hz using a  
706 video-based eye tracker (EyeLink 1000, SR Research Ltd, Kanata, Ontario) located below the  
707 computer monitor, following a standard nine-point calibration.

### 708 *Stimuli*

709 The position of the tip of the stylus—which we will refer to as the hand position—was  
710 represented on the monitor as a circular cursor (1 cm diameter) that moved with a ratio of 1.3  
711 times the displacement of the hand. Sixty open white circles (0.6 cm diameter; 6° spacing)  
712 were displayed in a ring (radius 10 cm) around a central starting circle (1 cm diameter). In  
713 report-and-reach trials (see below), target numbers (1-60) were displayed eccentric to the  
714 targets (see Fig. 1A). Movements were made from the starting circle to targets (2 cm  
715 diameter) located on the ring.

716

717 Throughout the experiment there were two target colours. Red targets were always presented  
718 on the right side of the ring and appeared at one of four locations (77.5, 107.5, 137.5, or  
719 167.5°), whereas blue targets always appeared on the left side of the ring at one of four



720 mirrored locations ( $-77.5$ ,  $-107.5$ ,  $-137.5$ , or  $-167.5^\circ$ ), as displayed in Figure 1A. Zero degrees  
721 corresponded to up on the screen (y-direction), and positive angles correspond to clockwise  
722 rotations. Note that these target locations were selected so that there would be little ambiguity  
723 in determining which target (blue or red), or corresponding aimpoint (see below), a given eye  
724 fixation was directed towards.

## 725 *Procedure*

726 Participants began each trial by moving the cursor to the central start position. Once this  
727 position was maintained for 0.5 s, either one unfilled target (red or blue) or two unfilled  
728 targets (one red and one blue) appeared on the ring. Following a fixed 2 s (1-target trials) or 4  
729 s (2-target trials) delay period, either the single target or one of the two targets was filled in,  
730 providing the go-signal to reach to that target as quickly and accurately as possible. All  
731 targets were presented in pseudorandom order such that the same (combination of) location(s)  
732 did not appear on two consecutive trials.

733

734 Participants were instructed to make a quick movement that “sliced” through the target.  
735 Visual feedback of the cursor was provided throughout the movement and, when the cursor  
736 crossed the ring, a circle (equal in size to the size of the cursor) was drawn at the crossing  
737 location to provide additional feedback about reach accuracy. Participants earned points for  
738 hitting the target, provided they initiated their movement between 100 and 600 ms following  
739 the go-signal. If the participant anticipated the go-signal (i.e., initiated movement less than  
740 100 ms after the go-signal) or took longer than 600 ms to initiate the movement, the message  
741 “too early” or “too late” was displayed, respectively, and the trial was aborted. A trial was  
742 considered a hit if any part of the cursor contacted any part of the target. The message “hit”  
743 or “miss” was displayed in all trials that met the reaction time criteria.

744

745 Participants first completed 64 reach trials with veridical cursor feedback (i.e., no visuomotor  
746 rotations were applied; baseline phase). This phase included 32 1-target trials (16 red and 16  
747 blue) and 32 2-target trials (16 red target cued and 16 blue target cued) presented in a  
748 pseudorandom order with all target locations cued an equal number of times.

749

750 Following the baseline phase, participants performed the report phase in which visuomotor  
751 rotations were applied. Specifically, visual feedback of the cursor was rotated about the hand  
752 start position,  $+45^\circ$  in trials in which the red target was cued and  $-45^\circ$  in trials in which the  
753 blue target was cued. Participants first completed a single reach trial with a single target, after  
754 which the experimenter informed participants that they would have to counteract a  
755 visuomotor rotation to successfully hit the target, encouraging participants to implement a re-  
756 aiming strategy. Opposing visuomotor rotations were used for the red and blue targets to  
757 guard against implicit adaptation to the rotations (Wigmore et al., 2002). To measure the  
758 magnitude of the re-aiming strategy, participants performed report-and-reach trials in which  
759 the target numbers were displayed and they were asked to verbally report the number of the  
760 circle they intended to reach towards (Taylor et al., 2014). In 1-target report-and-reach trials,  
761 participants reported a single number, and in 2-target trials they were asked to report a

762 number for each target (red then blue). After this report was completed, either the single  
763 target, or one of the two targets, was filled in, providing the cue to initiate a reach (as in reach  
764 trials). Participants first completed a block of 8 1-target report-and-reach trials with the red  
765 targets and a block of 8 1-target report-and-reach trials with the blue targets, being informed  
766 about the rotation after the first trial of each target color. Participants then completed a block  
767 of randomly intermixed 1-target and 2-target report-and reach trials, consisting of 16 1-target  
768 (8 red and 8 blue) and 16 2-target trials (8 red target cued and 8 blue target cued) with all  
769 target locations cued an equal number of times (32 trials in total). Following the report phase,  
770 participants completed the rotation phase, which consisted of reach trials without report. This  
771 phase was identical to the baseline phase, with the exception that visual feedback of the  
772 cursor was rotated by  $\pm 45^\circ$ . After completing the rotation phase, participants performed a  
773 phase without visual feedback (no feedback phase), which allowed us to assess the  
774 contributions of implicit and explicit learning. Participants were told that the rotation was  
775 turned off and instructed to aim directly at the target (Morehead et al., 2017). This phase  
776 involved 16 1-target (8 red and 8 blue) and 16 2-target (8 red cued and 8 blue cued) trials that  
777 were presented in a pseudorandom order and target locations were cued an equal number of  
778 times (32 trials in total). Participants were given 30 s breaks between blocks of trials and  
779 additional breaks halfway through the two 64 trial blocks experienced during the baseline and  
780 rotation phases.

### 781 *Data Analysis*

782 For all analyses, we only included trials where movements were initiated within 100 and 600  
783 ms following the go-signal and the cursor crossed the ring within 400 ms after movement  
784 onset (93% of trials). To obtain a measure of task performance, we used the endpoint hand  
785 angle relative to the target angle at the moment the cursor crossed the ring. Explicit learning  
786 (i.e., the magnitude of re-aiming) was quantified by converting the verbally reported  
787 landmark number to an angle relative to the target angle. For each participant, we computed  
788 mean hand and explicit angles for each phase and target, and then averaged values across the  
789 blue and red target after mirroring the angles for the red target across the vertical midline.

790  
791 We analysed gaze data for reach trials without report, including all trials in which there were  
792 no blinks or missing data for at least 50% of the time from initial target presentation until the  
793 cursor crossed the ring (91% of reach without report trials). Blinks were first removed from  
794 the  $x$  and  $y$  gaze positions and these signals were then low-pass filtered using a second-order  
795 recursive Butterworth filter with a cut-off frequency of 50 Hz. The filtered  $x$  and  $y$  gaze  
796 positions were used to calculate horizontal, vertical, and resultant gaze velocity. Data were  
797 drift-corrected offline by computing the median  $x$  and  $y$  gaze position at target onset (when  
798 gaze is still at the start position) across all trials, for each block separately, and shifting the  
799 data by aligning the median  $x$  and  $y$  gaze positions to the start position. Next, the onset and  
800 offset of saccades were defined based on resultant gaze velocity with saccades identified as  
801 having a resultant velocity above 200 mm/s (or  $\sim 22.6^\circ/\text{s}$ ) for five or more consecutive  
802 samples (i.e., 10 ms). Onsets were defined as the last of five samples below the threshold of  
803 200 mm/s and offsets were defined as the first of five samples below this threshold. We only

804 considered saccades with a minimum displacement of 5 mm. Fixations were then defined as  
805 periods of 50 or more consecutive samples (100 ms) during which neither a blink nor a  
806 saccade occurred. For each fixation, we computed the mean  $x$  and  $y$  position.

807

808 The resulting fixation positions were used to quantify 1) distributions of fixation positions, 2)  
809 the time course of gaze over a single trial in the rotation phase, and 3) the probability of  
810 fixating targets and aimpoints. For the first analysis, we first computed the angle relative to  
811 each target for all fixations within 50 and 150% of the target distance (i.e., non-central  
812 fixations). Fixations were binned into 60 bins, with the center of the bins corresponding to the  
813 angles of the open circles forming the ring, and the widths of the bins corresponding to the  
814 angular distance between two adjacent circles (i.e.,  $6^\circ$ ). We computed the fixation time in  
815 each bin relative to the target as a percentage of the total fixation time (including central  
816 fixations, excluding blinks and saccades) during the target preview of each trial. For 2-target  
817 trials, fixations were assigned to the closest target, and the fixation time in each bin was  
818 computed as a percentage of half of the total fixation time. For each participant, we computed  
819 the distribution of percentage fixation time in each bin for the blue and red target and for 1-  
820 and 2-target trials separately. We then computed the combined distribution, including all  
821 valid trials and mirroring fixation angles for the red target, for the baseline phase and in the  
822 rotation phase. The modes of the combined distribution were taken as a measure of the  
823 fixation angle. For 12 out of the 14 participants, this value was close to the ‘ideal aimpoint’ in  
824 the rotation phase. For 2 participants, we manually selected the second highest peak of the  
825 distribution as a measure of fixation angle, since the highest peak occurred at  $0^\circ$  (i.e., at the  
826 target).

827

828 For the second and third analyses, we defined fixation zones: a central zone, a target zone,  
829 and an aimpoint zone (see inset in Fig. 4). The central zone was a circle, centered on the hand  
830 start position, with a radius of 50% of the distance to the target ring. Target and aimpoint  
831 zones were defined for each target; i.e., there were two target zones and two aimpoint zones  
832 in two target trials. These zones were  $45^\circ$  wide wedges between 50 and 150% of the distance  
833 to the target ring. The target zone was centered on the target, and the aimpoint zone was  
834 centered  $45^\circ$  CW or CCW from the target, depending on whether the target was red or blue.  
835 That is, the aimpoint zone was centered on the hand location required to bring the cursor to  
836 the target when the visuomotor rotations were applied. To examine gaze patterns over the  
837 time course of a single trial in the rotation phase, we computed the probability of fixation in  
838 each of the zones for each time sample. The probabilities were computed after normalizing  
839 the reaction time interval and reach interval (i.e., movement time interval) of each trial to the  
840 mean duration of that interval across all participants, for 1-target trials and 2-target trials  
841 separately.

842

843 In the third analysis, we assessed how often participants fixated the targets and aimpoints. We  
844 computed the probability of a fixation in each zone during the baseline and rotation phase, for  
845 1- and 2-target trials separately, as a percentage of the total number of targets. To assess  
846 whether participants prepared a movement to both targets in 2-target trials, we computed the  
847 probability that a fixation occurred in both, one, or neither of the target and aimpoint zones.

848 Finally, we examined the temporal pattern of fixations in the target and aimpoint zones in  
849 two-target trials. Specifically, we expected that the first fixation in the aimpoint zone would  
850 be preceded by a fixation in the target zone on the same side of the display, while later  
851 aimpoint zone fixations would be preceded increasingly often by an aimpoint zone fixation  
852 on the opposite side of the display. This would allow participants to keep both aimpoint  
853 locations in memory in anticipation of one of the targets being cued. To test this, we  
854 computed the probability of fixation in each of the target zones, the aimpoint zone for the  
855 other target, and the start zone, separating fixations preceding the first, second and third  
856 aimpoint fixation. When sequential fixations in the same aimpoint zone occurred, we only  
857 used the first of these fixations. In addition, we examined the fixation angles of the first  
858 (entry) and last (exit) fixations for each gaze visit to a given aimpoint zone, during which  
859 there could be several fixations. We first selected all instances, in 2-target trials, in which an  
860 aimpoint zone was visited more than once, mirroring the angles for the red target so that all  
861 angles were positive. Next, we obtained the angle of the entry and exit fixations for the first  
862 and second visits of the aimpoint zone. We then tested whether the fixation angle changes  
863 during a visit to the aimpoint zone, i.e., by making small saccades within the aimpoint zone.

## 864 **Acknowledgements**

865 This work was supported by a Natural Sciences and Engineering Research Council (NSERC)  
866 Discovery grant awarded to J.R.F., an operating grant from the Canadian Institutes of Health  
867 Research (CIHR) awarded to J.R.F. and J.P.G. The authors would like to thank Martin York  
868 and Sean Hickman for technical assistance.

## 869 **Author Contributions**

870 All authors contributed to the design of the experiment and writing the paper. M.J.C. and L.S.  
871 performed the research. A.J.d.B and J.R.F. analysed and interpreted the data.

## 872 **Competing Interests**

873 The authors declare no competing financial or non-financial interests.

## 874 **References**

- 875 Baddeley A. 2007. Working Memory, Thought, and Action.  
876 doi:10.1093/acprof:oso/9780198528012.001.0001
- 877 Baddeley AD, Hitch G. 1974. Working Memory. *Psychology of Learning and Motivation*.  
878 doi:10.1016/s0079-7421(08)60452-1
- 879 Chapman CS, Gallivan JP, Wood DK, Milne JL, Culham JC, Goodale MA. 2010. Reaching for the  
880 unknown: multiple target encoding and real-time decision-making in a rapid reach task.  
881 *Cognition* **116**:168–176.
- 882 Christopoulos V, Bonaiuto J, Andersen RA. 2015. A biologically plausible computational theory for  
883 value integration and action selection in decisions with competing alternatives. *PLoS Comput*  
884 *Biol* **11**:e1004104.
- 885 Christopoulos V, Schrater PR. 2015. Dynamic Integration of Value Information into a Common  
886 Probability Currency as a Theory for Flexible Decision Making. *PLoS Comput Biol*  
887 **11**:e1004402.
- 888 Cisek P. 2012. Making decisions through a distributed consensus. *Curr Opin Neurobiol* **22**:927–936.
- 889 Cisek P. 2007. Cortical mechanisms of action selection: the affordance competition hypothesis. *Philos*  
890 *Trans R Soc Lond B Biol Sci* **362**:1585–1599.
- 891 Cisek P, Kalaska JF. 2010. Neural mechanisms for interacting with a world full of action choices.  
892 *Annu Rev Neurosci* **33**:269–298.
- 893 Cisek P, Kalaska JF. 2005. Neural correlates of reaching decisions in dorsal premotor cortex:  
894 specification of multiple direction choices and final selection of action. *Neuron* **45**:801–814.
- 895 Coallier É, Michelet T, Kalaska JF. 2015. Dorsal premotor cortex: neural correlates of reach target  
896 decisions based on a color-location matching rule and conflicting sensory evidence. *J*  
897 *Neurophysiol* **113**:3543–3573.
- 898 Crawford JD, Medendorp WP, Marotta JJ. 2004. Spatial transformations for eye-hand coordination. *J*  
899 *Neurophysiol* **92**:10–19.
- 900 de Brouwer AJ, Albaghdadi M, Flanagan JR, Gallivan JP. 2018. Using gaze behavior to parcellate the  
901 explicit and implicit contributions to visuomotor learning. *J Neurophysiol* **120**:1602–1615.
- 902 Dekleva BM, Kording KP, Miller LE. 2018. Single reach plans in dorsal premotor cortex during a  
903 two-target task. *Nat Commun* **9**:3556.
- 904 Flanagan JR, Johansson RS. 2003. Action plans used in action observation. *Nature* **424**:769–771.
- 905 Flanagan JR, Rotman G, Reichelt AF, Johansson RS. 2013. The role of observers' gaze behaviour  
906 when watching object manipulation tasks: predicting and evaluating the consequences of action.  
907 *Philos Trans R Soc Lond B Biol Sci* **368**:20130063.
- 908 Flash T, Hogan N. 1985. The coordination of arm movements: an experimentally confirmed  
909 mathematical model. *J Neurosci* **5**:1688–1703.
- 910 Gallivan JP, Barton KS, Chapman CS, Wolpert DM, Flanagan JR. 2015. Action plan co-optimization  
911 reveals the parallel encoding of competing reach movements. *Nat Commun* **6**:7428.
- 912 Gallivan JP, Bowman NAR, Chapman CS, Wolpert DM, Flanagan JR. 2016a. The sequential  
913 encoding of competing action goals involves dynamic restructuring of motor plans in working  
914 memory. *J Neurophysiol* **115**:3113–3122.
- 915 Gallivan JP, Chapman CS, Wolpert DM, Flanagan JR. 2018. Decision-making in sensorimotor  
916 control. *Nat Rev Neurosci* **19**:519–534.
- 917 Gallivan JP, Chapman CS, Wood DK, Milne JL, Ansari D, Culham JC, Goodale MA. 2011. One to  
918 four, and nothing more: nonconscious parallel individuation of objects during action planning.  
919 *Psychol Sci* **22**:803–811.
- 920 Gallivan JP, Logan L, Wolpert DM, Flanagan JR. 2016b. Parallel specification of competing  
921 sensorimotor control policies for alternative action options. *Nat Neurosci* **19**:320–326.
- 922 Gallivan JP, Stewart BM, Baugh LA, Wolpert DM, Flanagan JR. 2017. Rapid Automatic Motor  
923 Encoding of Competing Reach Options. *Cell Rep* **18**:1619–1626.
- 924 Haith AM, Huberdeau DM, Krakauer JW. 2015. Hedging your bets: intermediate movements as  
925 optimal behavior in the context of an incomplete decision. *PLoS Comput Biol* **11**:e1004171.
- 926 Haith AM, Pakpoor J, Krakauer JW. 2016. Independence of Movement Preparation and Movement



- 927 Initiation. *J Neurosci* **36**:3007–3015.
- 928 Harris CM, Wolpert DM. 1998. Signal-dependent noise determines motor planning. *Nature* **394**:780–  
929 784.
- 930 Herzfeld DJ, Vaswani PA, Marko MK, Shadmehr R. 2014. A memory of errors in sensorimotor  
931 learning. *Science* **345**:1349–1353.
- 932 Hudson TE, Maloney LT, Landy MS. 2007. Movement planning with probabilistic target information.  
933 *J Neurophysiol* **98**:3034–3046.
- 934 Johansson RS, Westling G, Bäckström A, Flanagan JR. 2001. Eye-hand coordination in object  
935 manipulation. *J Neurosci* **21**:6917–6932.
- 936 Klaes C, Westendorff S, Chakrabarti S, Gail A. 2011. Choosing Goals, Not Rules: Deciding among  
937 Rule-Based Action Plans. *Neuron* **70**:536–548.
- 938 Land MF, Furneaux S. 1997. The knowledge base of the oculomotor system. *Philos Trans R Soc Lond*  
939 *B Biol Sci* **352**:1231–1239.
- 940 Land MF, Lee DN. 1994. Where we look when we steer. *Nature*. doi:10.1038/369742a0
- 941 Land MF, McLeod P. 2000. From eye movements to actions: how batsmen hit the ball. *Nat Neurosci*  
942 **3**:1340–1345.
- 943 Land M, Mennie N, Rusted J. 1999. The roles of vision and eye movements in the control of activities  
944 of daily living. *Perception* **28**:1311–1328.
- 945 Land M, Tatler B. 2009. Looking and Acting: Vision and Eye Movements in Natural Behaviour.  
946 Oxford University Press.
- 947 McClelland JL. 1979. On the time relations of mental processes: An examination of systems of  
948 processes in cascade. *Psychol Rev* **86**:287–330.
- 949 Miyamoto YR, Wang S, Smith MA. 2020. Implicit adaptation compensates for erratic explicit  
950 strategy in human motor learning. *Nature Neuroscience*. doi:10.1038/s41593-020-0600-3
- 951 Morehead JR, Taylor JA, Parvin DE, Ivry RB. 2017. Characteristics of Implicit Sensorimotor  
952 Adaptation Revealed by Task-irrelevant Clamped Feedback. *J Cogn Neurosci* **29**:1061–1074.
- 953 Nashed JY, Diamond JS, Gallivan JP, Wolpert DM, Flanagan JR. 2017. Grip force when reaching  
954 with target uncertainty provides evidence for motor optimization over averaging. *Sci Rep*  
955 **7**:11703.
- 956 Neggers SF, Bekkering H. 2001. Gaze anchoring to a pointing target is present during the entire  
957 pointing movement and is driven by a non-visual signal. *J Neurophysiol* **86**:961–970.
- 958 Oldfield RC. 1971. The assessment and analysis of handedness: the Edinburgh inventory.  
959 *Neuropsychologia* **9**:97–113.
- 960 Pastor-Bernier A, Cisek P. 2011. Neural correlates of biased competition in premotor cortex. *J*  
961 *Neurosci* **31**:7083–7088.
- 962 Prablanc C, Echallier JE, Jeannerod M, Komilis E. 1979. Optimal response of eye and hand motor  
963 systems in pointing at a visual target. II. Static and dynamic visual cues in the control of hand  
964 movement. *Biol Cybern* **35**:183–187.
- 965 Prablanc C, Martin O. 1992. Automatic control during hand reaching at undetected two-dimensional  
966 target displacements. *J Neurophysiol* **67**:455–469.
- 967 Prablanc C, Pélisson D, Goodale MA. 1986. Visual control of reaching movements without vision of  
968 the limb. I. Role of retinal feedback of target position in guiding the hand. *Exp Brain Res*  
969 **62**:293–302.
- 970 Rand MK, Rentsch S. 2015. Gaze locations affect explicit process but not implicit process during  
971 visuomotor adaptation. *J Neurophysiol* **113**:88–99.
- 972 Rentsch S, Rand MK. 2014. Eye-hand coordination during visuomotor adaptation with different  
973 rotation angles. *PLoS One* **9**:e109819.
- 974 Rotman G, Troje NF, Johansson RS, Flanagan JR. 2006. Eye movements when observing predictable  
975 and unpredictable actions. *J Neurophysiol* **96**:1358–1369.
- 976 Scott SH. 2004. Optimal feedback control and the neural basis of volitional motor control. *Nat Rev*  
977 *Neurosci* **5**:532–546.
- 978 Sternberg S. 1969. Memory-scanning: mental processes revealed by reaction-time experiments. *Am*  
979 *Sci* **57**:421–457.
- 980 Stewart BM, Baugh LA, Gallivan JP, Flanagan JR. 2013. Simultaneous encoding of the direction and  
981 orientation of potential targets during reach planning: evidence of multiple competing reach

- 982 plans. *J Neurophysiol* **110**:807–816.
- 983 Stewart BM, Gallivan JP, Baugh LA, Flanagan JR. 2014. Motor, not visual, encoding of potential
- 984 reach targets. *Curr Biol* **24**:R953–4.
- 985 Suriya-Arunroj L, Gail A. 2019. Complementary encoding of priors in monkey frontoparietal network
- 986 supports a dual process of decision-making. *Elife* **8**. doi:10.7554/eLife.47581
- 987 Taylor JA, Ivry RB. 2011. Flexible cognitive strategies during motor learning. *PLoS Comput Biol*
- 988 **7**:e1001096.
- 989 Taylor JA, Krakauer JW, Ivry RB. 2014. Explicit and implicit contributions to learning in a
- 990 sensorimotor adaptation task. *J Neurosci* **34**:3023–3032.
- 991 Thura D, Cisek P. 2014. Deliberation and commitment in the premotor and primary motor cortex
- 992 during dynamic decision making. *Neuron* **81**:1401–1416.
- 993 Todorov E. 2004. Optimality principles in sensorimotor control. *Nat Neurosci* **7**:907–915.
- 994 Todorov E, Jordan MI. 2002. Optimal feedback control as a theory of motor coordination. *Nat*
- 995 *Neurosci* **5**:1226–1235.
- 996 Wigmore V, Tong C, Flanagan JR. 2002. Visuomotor rotations of varying size and direction compete
- 997 for a single internal model in motor working memory. *J Exp Psychol Hum Percept Perform*
- 998 **28**:447–457.
- 999 Wong AL, Haith AM. 2017. Motor planning flexibly optimizes performance under uncertainty about
- 1000 task goals. *Nat Commun* **8**:14624.
